# Supplementary material
Source: Springer Nature journal article supplement (https://www.springermedizin.de/resource/supplementary/12884_2010_365_MOESM1_ESM.pdf/9457688)

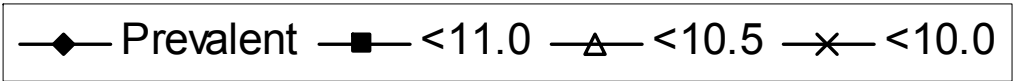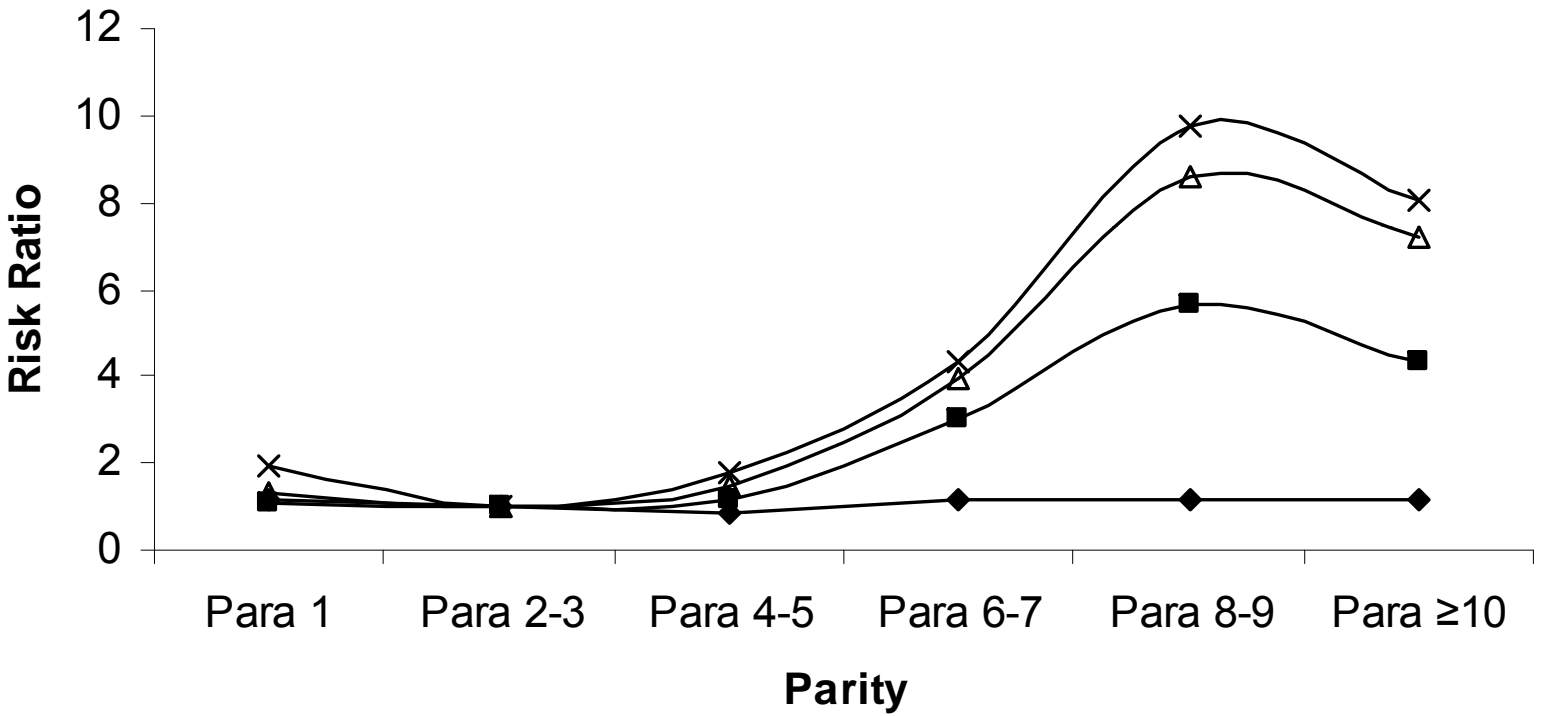

Supplement: MOESM1 [file 9457688]
